# Supplementary material
Source: PubMed Central journal article supplement (PMC5888852)
Supplement: JCB703124_supplementary_material.pdf [file JCB703124_supplementary_material.pdf]

## **Supplementary Information**

### **Antenatal dexamethasone before asphyxia promotes cystic neural injury in preterm fetal sheep by inducing hyperglycemia**

Christopher A. Lear, Joanne O. Davidson, Georgia R. Mackay; Paul P. Drury,  
Robert Galinsky, Josine S. Quaedackers, Alistair J Gunn, Laura Bennet

The Fetal Physiology and Neuroscience Group, Department of Physiology,  
The University of Auckland, Auckland, New Zealand

## Supplemental Tables

|                                          |    | Recovery     |              |              |              |              |              |              |
|------------------------------------------|----|--------------|--------------|--------------|--------------|--------------|--------------|--------------|
|                                          |    | +1 day       | +2 days      | +3 days      | +4 days      | +5 days      | +6 days      | +7 days      |
| pH                                       | SS | 7.37 ± 0.00  | 7.36 ± 0.01  | 7.36 ± 0.00  | 7.37 ± 0.00  | 7.37 ± 0.01  | 7.37 ± 0.01  | 7.37 ± 0.01  |
|                                          | DS | 7.36 ± 0.01Φ | 7.32 ± 0.02Φ | 7.34 ± 0.02Φ | 7.34 ± 0.01Φ | 7.35 ± 0.01Φ | 7.35 ± 0.01Φ | 7.34 ± 0.02Φ |
|                                          | SA | 7.38 ± 0.01  | 7.38 ± 0.01  | 7.39 ± 0.01  | 7.39 ± 0.01  | 7.39 ± 0.01  | 7.39 ± 0.01  | 7.38 ± 0.01  |
|                                          | DA | 7.36 ± 0.02Φ | 7.33 ± 0.02Φ | 7.37 ± 0.01Φ | 7.36 ± 0.00Φ | 7.35 ± 0.01Φ | 7.37 ± 0.01Φ | 7.36 ± 0.00Φ |
|                                          | GA | 7.36 ± 0.01# | 7.35 ± 0.01# | 7.35 ± 0.01# | 7.35 ± 0.01# | 7.35 ± 0.01# | 7.35 ± 0.01# | 7.35 ± 0.01# |
| P <sub>a</sub> CO <sub>2</sub><br>(mmHg) | SS | 49.4 ± 0.7   | 48.9 ± 1.0   | 49.5 ± 0.8   | 44.4 ± 1.7   | 45.9 ± 1.6   | 48.8 ± 1.6   | 51.7 ± 1.8   |
|                                          | DS | 52.6 ± 2.6   | 50.8 ± 1.2   | 49.0 ± 1.6   | 48.6 ± 1.8   | 51.4 ± 2.5   | 51.2 ± 1.4   | 53.5 ± 1.9   |
|                                          | SA | 47.3 ± 0.8   | 47.2 ± 0.8   | 48.0 ± 0.9   | 47.2 ± 1.5   | 48.3 ± 1.6   | 49.3 ± 0.8   | 48.0 ± 1.3   |
|                                          | DA | 49.5 ± 2.0   | 50.5 ± 3.7   | 48.5 ± 0.6   | 45.7 ± 2.4   | 50.9 ± 2.0   | 50.8 ± 1.0   | 50.9 ± 1.2   |
|                                          | GA | 48.5 ± 0.9   | 47.4 ± 1.4   | 49.4 ± 1.2   | 49.6 ± 1.0   | 48.4 ± 1.1   | 47.7 ± 1.5   | 48.4 ± 1.3   |
| P <sub>a</sub> O <sub>2</sub><br>(mmHg)  | SS | 22.8 ± 1.1   | 24.0 ± 1.0   | 23.5 ± 1.4   | 23.5 ± 1.4   | 24.3 ± 1.3   | 23.4 ± 1.8   | 23.8 ± 1.3   |
|                                          | DS | 25.7 ± 1.1   | 23.8 ± 1.3   | 24.4 ± 0.9   | 21.0 ± 1.9   | 20.7 ± 1.9   | 21.6 ± 1.6   | 20.8 ± 2.2   |
|                                          | SA | 27.9 ± 1.2Ψ  | 29.2 ± 1.4Ψ  | 27.1 ± 1.2Ψ  | 28.1 ± 1.3Ψ  | 26.7 ± 1.7Ψ  | 26.6 ± 1.7Ψ  | 27.2 ± 2.0Ψ  |
|                                          | DA | 27.3 ± 1.2Ψ  | 30.5 ± 1.3Ψ  | 29.0 ± 1.5Ψ  | 29.1 ± 1.3Ψ  | 29.8 ± 1.3Ψ  | 29.1 ± 1.2Ψ  | 27.4 ± 1.6Ψ  |
|                                          | GA | 26.8 ± 0.9   | 27.5 ± 1.8   | 27.7 ± 1.2   | 28.3 ± 1.4   | 27.5 ± 1.1   | 27.4 ± 1.3   | 26.9 ± 1.4   |
| Lactate<br>(mmol/L)                      | SS | 0.9 ± 0.1    | 0.9 ± 0.1    | 0.8 ± 0.1    | 0.9 ± 0.1    | 0.9 ± 0.1    | 0.8 ± 0.1    | 0.9 ± 0.1    |
|                                          | DS | 0.8 ± 0.1    | 1.0 ± 0.2    | 0.9 ± 0.1    | 0.9 ± 0.1    | 0.8 ± 0.1    | 0.8 ± 0.1    | 0.9 ± 0.1    |
|                                          | SA | 1.2 ± 0.2    | 0.9 ± 0.1    | 1.0 ± 0.0    | 0.9 ± 0.1    | 0.9 ± 0.1    | 0.9 ± 0.1    | 0.8 ± 0.1    |
|                                          | DA | 1.0 ± 0.1    | 0.8 ± 0.0    | 0.8 ± 0.1    | 0.8 ± 0.0    | 0.8 ± 0.0    | 0.7 ± 0.0    | 0.7 ± 0.0    |
|                                          | GA | 1.4 ± 0.2    | 0.9 ± 0.1    | 0.9 ± 0.1    | 0.9 ± 0.1    | 0.9 ± 0.1    | 0.8 ± 0.1    | 0.8 ± 0.1    |
| Glucose<br>(mmol/L)                      | SS | 1.1 ± 0.1    | 1.1 ± 0.1    | 1.0 ± 0.1    | 1.0 ± 0.1    | 1.1 ± 0.1    | 1.1 ± 0.1    | 1.0 ± 0.1    |
|                                          | DS | 1.2 ± 0.1    | 1.0 ± 0.1    | 1.0 ± 0.1    | 0.9 ± 0.1    | 0.8 ± 0.1    | 0.8 ± 0.1    | 0.8 ± 0.1    |
|                                          | SA | 1.2 ± 0.2    | 1.0 ± 0.2    | 0.8 ± 0.2    | 1.1 ± 0.0    | 1.1 ± 0.1    | 1.1 ± 0.1    | 1.1 ± 0.1    |
|                                          | DA | 1.8 ± 0.3    | 1.1 ± 0.1    | 1.2 ± 0.2    | 1.1 ± 0.1    | 1.2 ± 0.1    | 1.1 ± 0.1    | 1.2 ± 0.1    |
|                                          | GA | 1.2 ± 0.1    | 1.0 ± 0.1    | 1.0 ± 0.1    | 1.2 ± 0.1    | 1.1 ± 0.1    | 0.9 ± 0.1    | 1.0 ± 0.1    |

**Supplementary Table 1. Fetal pH, blood gases and metabolites during recovery.** SS, saline-sham; DS, dexamethasone-sham; SA, saline-asphyxia; DA, dexamethasone-asphyxia; GA, glucose-asphyxia. Data are means ± SEM. P<sub>a</sub>CO<sub>2</sub>; arterial pressure of carbon dioxide, P<sub>a</sub>O<sub>2</sub>; arterial pressure of oxygen. Ψp<0.05, effect of asphyxia; Φp<0.05, effect of dexamethasone treatment; #p<0.05, glucose-asphyxia vs. saline-asphyxia.

| <b>Group</b> | <b>Sex</b> | <b>Body weight (g)</b> | <b>Brain weight (g)</b> |
|--------------|------------|------------------------|-------------------------|
| <b>SS</b>    | 3 F, 5 M   | 1970.5 ± 180.0         | 34.3 ± 0.8              |
| <b>DS</b>    | 4 F, 5 M   | 1841.2 ± 116.7         | 28.8 ± 1.2 Φ            |
| <b>SA</b>    | 4 F, 5 M   | 2078.1 ± 157.5         | 27.6 ± 1.0 Ψ            |
| <b>DA</b>    | 5 F, 2 M   | 2343.4 ± 179.0         | 27.6 ± 0.6ΨΦ            |
| <b>GA</b>    | 3 F, 4 M   | 2385.3 ± 258.1         | 28.0 ± 2.0              |

**Supplementary Table 2. Fetal sex and post mortem data.** SS, saline-sham; DS, dexamethasone-sham; SA, saline-asphyxia; DA, dexamethasone-asphyxia; GA, glucose-asphyxia; F, female; M, male. Data are means ± SEM. Ψp<0.05, effect of asphyxia; Φp<0.05, effect of dexamethasone treatment.

## Supplemental Figures

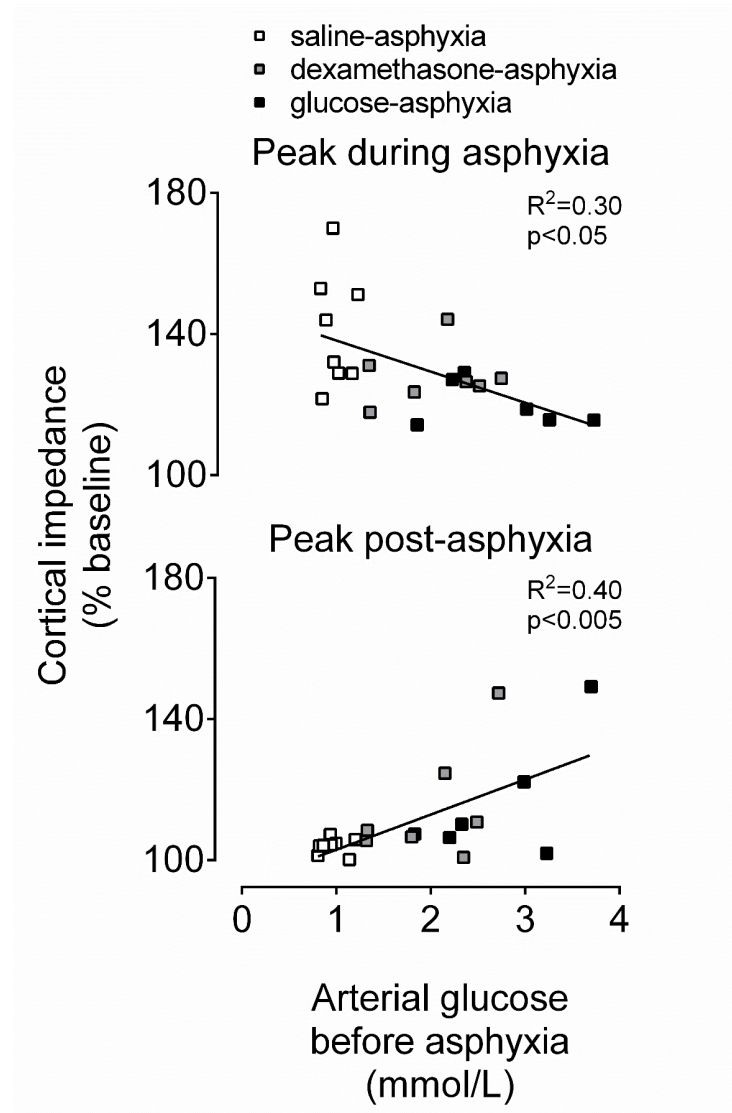

**Supplementary Figure 1.** The top graph illustrates that higher glucose levels before asphyxia in the three asphyxia groups were associated with a lower peak in impedance during asphyxia. The bottom graph shows that higher glucose levels before asphyxia were associated with a higher secondary peak in impedance during recovery after asphyxia.

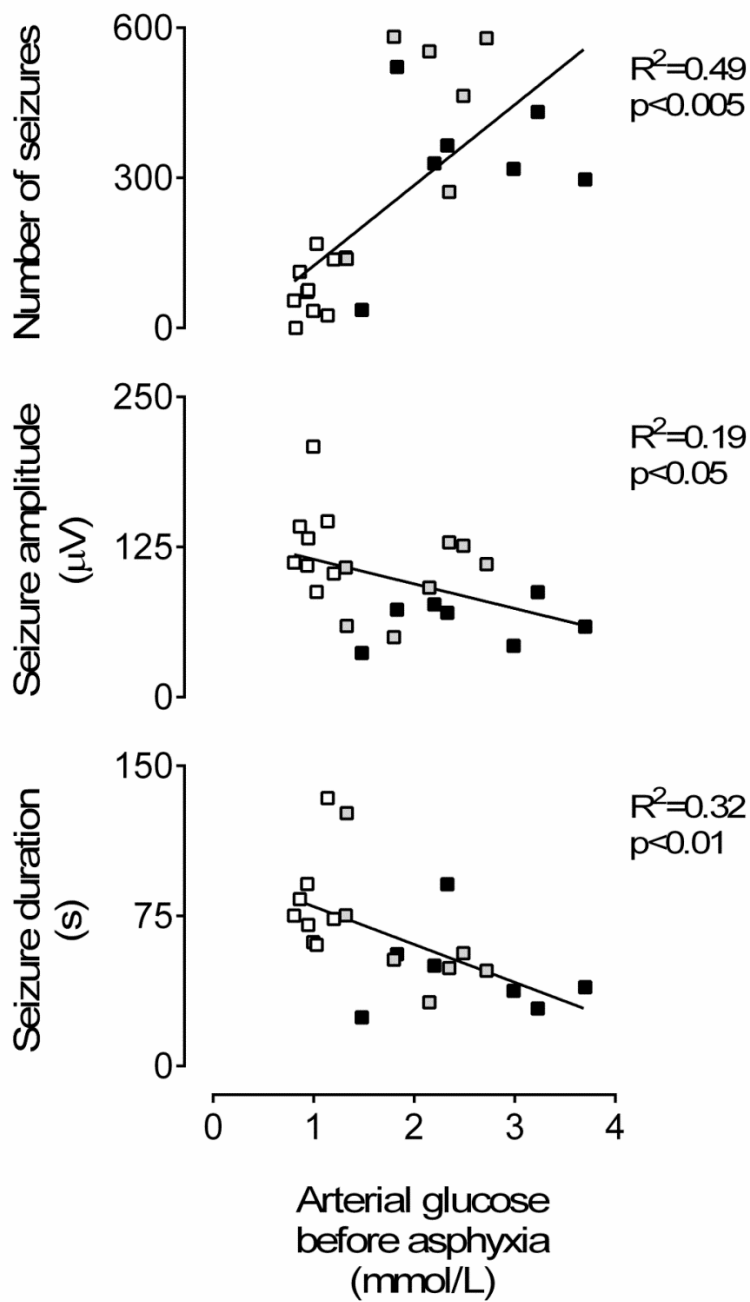

**Supplementary Figure 2.** Increased arterial blood glucose levels before asphyxia in the three asphyxia groups were associated with increased numbers of as well as decreased amplitude and duration of post-asphyxial seizures.
